# Supplementary material for: g-C3N4/Ti3C2Tx (MXenes) composite with oxidized surface groups for efficient photocatalytic hydrogen evolution
Source: Royal Society of Chemistry journal article supplement (doi:10.1039/c8ta02706d), 2018-01-01
Supplement: c8ta02706d1.pdf [file c8ta02706d1.pdf]

## Supporting Information

### $g\text{-C}_3\text{N}_4/\text{Ti}_3\text{C}_2\text{T}_x(\text{MXenes})$ Composite with Oxidized Surface Groups for Efficient Photocatalytic Hydrogen Evolution

Yuliang Sun<sup>a</sup>, Di Jin<sup>a</sup>, Yuan Sun<sup>a</sup>, Xing Meng<sup>a,c,\*</sup>, Yu Gao<sup>a</sup>, Yohan Dall'Agnese<sup>a</sup>,  
Gang Chen<sup>a,b</sup>, Xiao-Feng Wang<sup>a,\*</sup>

<sup>a</sup>*Key Laboratory of Physics and Technology for Advanced Batteries (Ministry of Education), College of Physics, Jilin University, Changchun 130012, PR China*

<sup>b</sup>*State Key Laboratory of Superhard Materials, Jilin University, Changchun 130012, PR China*

<sup>c</sup>*A. J. Drexel Nanomaterials Institute, and Department of Materials Science and Engineering, Drexel University, Philadelphia, Pennsylvania 19104, United States*

The images of HRTEM of the composite were showed in supporting information. The HER of different ratios and annealing method between g-C<sub>3</sub>N<sub>4</sub> and Ti<sub>3</sub>C<sub>2</sub> and  $\Delta$ GH (eV) of different terminated Ti<sub>3</sub>C<sub>2</sub> were also demonstrated.

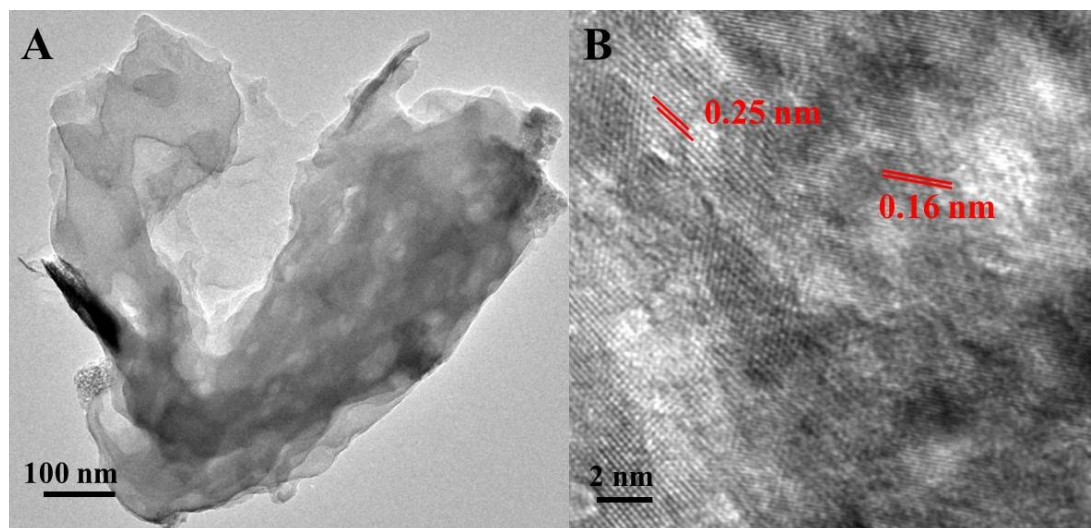

Figure S1. The HRTEM image of g-C<sub>3</sub>N<sub>4</sub> with 30% Ti<sub>3</sub>C<sub>2</sub> annealed in air for A) low and B) high magnification.

Figure S1 showed the HRTEM image of the hybrid. The interface between g-C<sub>3</sub>N<sub>4</sub> and Ti<sub>3</sub>C<sub>2</sub> could be observed obviously.

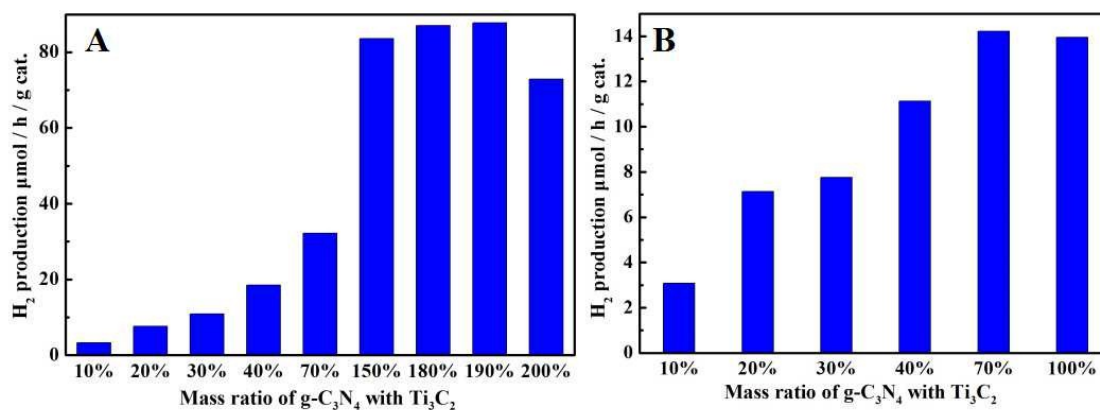

Figure S2. The HER of A) g-C<sub>3</sub>N<sub>4</sub> with Ti<sub>3</sub>C<sub>2</sub> annealed in N<sub>2</sub> and B) g-C<sub>3</sub>N<sub>4</sub> with Ti<sub>3</sub>C<sub>2</sub> annealed in air at different ratios.

As shown in Figure S2, the mass ratio of g-C<sub>3</sub>N<sub>4</sub> with Ti<sub>3</sub>C<sub>2</sub> at 190% annealed in air demonstrated the best performance for hydrogen evolution while that at 70% annealed in N<sub>2</sub> did.

In Figure S3, g-C<sub>3</sub>N<sub>4</sub> with 3% Pt as cocatalyst demonstrated the best H<sub>2</sub> production, which achieved 56.2  $\mu\text{mol/h/g.cat}$  and lower than that of g-C<sub>3</sub>N<sub>4</sub> with 190% Ti<sub>3</sub>C<sub>2</sub> annealed in air.

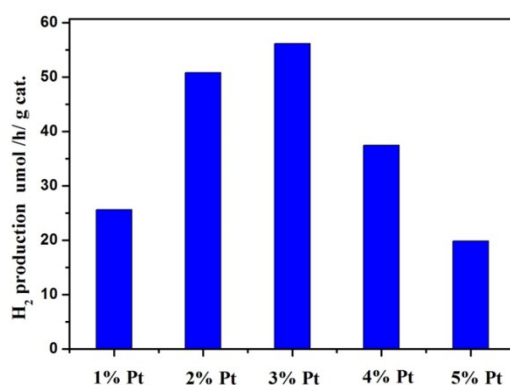

Figure S3. The HER of g-C<sub>3</sub>N<sub>4</sub> with Pt at different ratios.

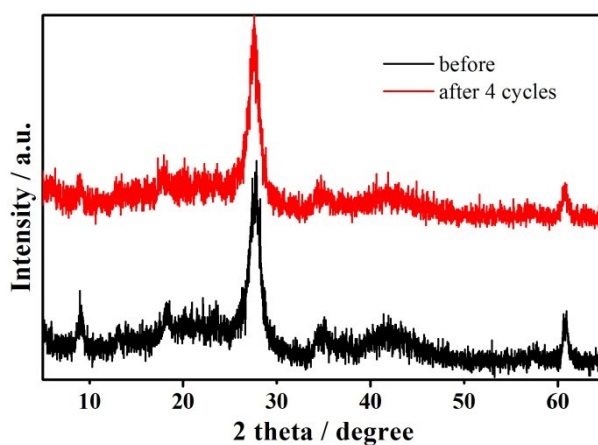

Figure S4. The XRD spectra of g-C<sub>3</sub>N<sub>4</sub> with 30% Ti<sub>3</sub>C<sub>2</sub> annealed in air before and after 4 cycles.

Though the separation of g-C<sub>3</sub>N<sub>4</sub> and Ti<sub>3</sub>C<sub>2</sub> after tests, no obvious differences were shown between the XRD spectra of g-C<sub>3</sub>N<sub>4</sub> with 30% Ti<sub>3</sub>C<sub>2</sub> annealed in air before and after 4 cycles.

Table S1 displayed the  $\Delta G_H$  of Ti<sub>3</sub>C<sub>2</sub> with different termination groups.  $\Delta G_H$  of -F terminations were much higher than that of -O, thus -O terminations showed a better photocatalysis activity of hydrogen evolution.

Table S1.  $\Delta G_H$  (eV) of different terminated Ti<sub>3</sub>C<sub>2</sub> with different atomic H coverage

| System                           | structure                                                                           | Site | $\theta_H$ (ML) | $\Delta G_H$ (eV) |
|----------------------------------|-------------------------------------------------------------------------------------|------|-----------------|-------------------|
| Bare                             |    | -    | 25%             | -0.659            |
|                                  |                                                                                     |      | 50%             | -0.626            |
| O-Ti <sub>3</sub> C <sub>2</sub> |   | c    | <b>25%</b>      | <b>0.011</b>      |
|                                  |                                                                                     |      | 50%             | 0.285             |
| F-Ti <sub>3</sub> C <sub>2</sub> |  | c    | 25%             | 2.740             |
|                                  |                                                                                     |      | 50%             | 3.705             |
